# Supplementary material
Source: Elsevier journal article supplement (https://www.sciencedirect.com/science/article/pii/S0212656716306072)
Supplement: mmc1 [file S0212656716306072:mmc1.docx]

| Listado de los centros e investigadores principales participantes | | |
| --- | --- | --- |
| **Centro** | **Investigador principal** | |
| **Andalucía** | | |
| C.S. Fuengirola - Oeste | Dr. Rodrigo Mayo Cabeza | |
| C.S. Fuensanta (Córdoba) | Dr. Enrique Martín Rioboó | |
| C.S. Levante Norte | Dr. Juan José Muñoz Gavilán | |
| C.S. Montejícar | Dr. Pablo Gutiérrez Muñoz | |
| C.S. Santa Rosa (Córdoba) | Dra. Cristina Aguado Taberne | |
| C.S. Tijola (Almería) | Dr. Antonio Jiménez López | |
| C.S. Torre del Mar (Málaga) | Dra. Maria Victoria Vilar Linares | |
| **Aragón** | |
| C.S. Canal Imperial (Zaragoza / Teruel) | Dra. Maria Antonia Sánchez Calavera | |
| C.S. La Almunia | Dr. Muti Mahmoud-Ibrahim | |
| C.S. Muñoz Fernández Ruiseñores | Dr. José Porta Quintana | |
| C.S. San José Norte | Dr. José Ramón Domínguez Alonso | |
| CAP. Dromda Delicias Sur (Zaragoza) | Dr. Rodrigo Córdoba García | |
| **Baleares** | | |
| C.S. Lluc Major (Mallorca) | Dr. Gabriel Lliteras Fleixas | |
| **Cataluña** | | |
| ABS Badia Vallés | Dr. Lucas Mengual | |
| CAP Adriá | Dr. Ferran Marco Cardona | |
| CAP Banyoles (Girona) | Dr. Giuseppe Ruffo | |
| CAP Cornellà 2 (Sant Ildefons) | Dra. Marta D'Lacoste Farre | |
| CAP El Pla (Sant Feliu Llobregat) | Dra. Delia Mestres | |
| CAP Manso | Dra. Ana Isabel Pérez Aragues | |
| CAP Palau-Solità i Plegamans | Dr. Roque Lucas Sánchez | |
| CAP Passeig de Maragall | Dra. Arantxa González Osuna | |
| CAP Pubilla Cases | Dra. Isabel Ortega Abarca | |
| CAP Rambla (Terrassa) | Dra. Lidia González Gil | |
| CAP San Pere (Reus) | Dr. Joan Lluís Frigola Marcet | |
| CAP Sardenya | Dr. Mariano de la Figuera von Wichmann | |
| CAP Terrassa Oest | Dra. Judith Calpe | |
| **Galicia** | | |
| C.S Casa del Mar (La Coruña) | Dr. Manuel Barral Castro | |
| C.S de Porriño (Vigo) | De. Fco. Javier Cecilio Montero | |
| C.S Fontela Maristany (Ferrol) | Dr. Jesús de Juan Prego | |
| C.S Noia | Dr. Antonio Francisco Calvo Guerrero | |
| C.S Ribeira | Dr. José María Fernández Villaverde | |
| C.S Serantes | Dr. Andrés Martínez Gonzalez | |
| C.S Vilanova de Arousa | Dr. Antonio A. Regueiro Martínez | |
| C.S. Calle Cuba (Vigo) | Dra. Maria del Mar Díez Ponce | |
| C.S. Chapela | Dra. Susana Daviña Romero | |
| C.S. De Pintor Colmeiro | Dr. José Manuel Soto Gonzalez | |
| C.S. La Cañiza | Dra. Beatriz Margarita Reboredo Otero | |
| C.S. Porto Do Son | Dr. Sergio Cinza | |
| Casa do Mar (Marín) | Dr. Luis Segovia Castro | |
| **Madrid** | | |
| C. S. Gregorio Marañón | Dr. Antonio Arroyo Pérez | |
| C.S Andrés Mellado | Dra. Beatriz Alvarez Alvarez | |
| C.S Las Rozas Abajon (Las Rozas) | Dr. Javier Velasco Quintana | |
| C.S Legazpi | Dr. Ignacio Brotons Garcia | |
| C.S Potosí | Dr. Antonio de Torres López | |
| C.S Villaamil | Dra. Elena López de la Fuente | |
| C.S. Comillas | Dra. Olga García Vallejos | |
| C.S. García Noblejas | Dra. Silvia Medrano Sanz | |
| C.S. General Ricardos | Dr. Carlos Casado Álvaro | |
| C.S. Goya | Dra. Marta Guzón Centeno | |
| C.S. Isla de Oza | Dr. Pedro Javier Cañones Garzón | |
| C.S. Mar Báltico | Dra. Ana María Alayeto Sánchez | |
| C.S. San Fermin | Dr. Javier Cejudo Palmero | |
| **Navarra** | | |
| CS Cascante | Dr. Luis Serrano Mallagray | |
| CS Puente la Reina | Dr. Manuel Pedro Ayechu Redín | |
| **País Vasco** | | |
| Ambulatorio Amara Berri (Gipuzkoa) | Dra. Mª Mercedes Lasa Garmendia | |
| Ambulatorio Dr. Areilza | Dra. Margarita Maortua Maortua | |
| Ambulatorio Markonzaga | Dra. Begoña Ruiz Aguirre | |
| Ambulatorio de Bergara(Guipúzcoa) | Dra. Mª Rosario Alustiza Vergara | |
| C.S. Kueto-Sestao | Dr. José Antonio Quindimil | |
| C.S. Landako | Dr. Jorge Alberto Abraldes Dopazo | |
| C.S. Ntra Sra de Estibaliz (Álava) | Dr. Emilio Aberasturi Ramírez | |
| **Valencia** | | |
| C.S. Alvarez de la Riva (Orihuela-Alicante) | Dra. Inmaculada C. Marin Cabrera | |
